# Supplementary material for: Anti-dsDNA B-Cell ELISpot as a Monitoring and Flare Prediction Tool in SLE Patients
Source: MDPI journal article supplement (doi:10.3390/jcm12041295), 2023-02-06
Supplement: s1 [file s1]

Supplementary Table S1. Different conditions tested from the original ones in Hanaoka design.  
In bold, conditions selected for the ELISpot.

|                    | <b><u>Hanaoka conditions</u></b> | <b><u>Conditions tested</u></b>                                             |
|--------------------|----------------------------------|-----------------------------------------------------------------------------|
| Samples            | N/A                              | Fresh, frozen                                                               |
| DNA coating        | Albumin                          | Albumin, DNA Coating Solution                                               |
| PBMCs              | 500,000 cells/well               | 0.5M cells/well, 1M cells/well, 2M cells/well, 4M cells/well, 8M cells/well |
| Replicate wells    | 5 wells                          | 3 wells, 5 wells, 7 wells                                                   |
| DNA origin         | Lambda phage                     | Beef thymus, lambda phage                                                   |
| Nuclease treatment | Treated DNA                      | Treated DNA, untreated DNA                                                  |
| DNA concentration  | 100 µg/mL                        | 200 µg/mL, 100 µg/mL                                                        |
| Blocking solution  | N/A                              | 100 µL, 150 µL                                                              |

Abbreviations: M (million).
